# Supplementary material
Source: MDPI journal article supplement (https://www.mdpi.com/2073-445X/10/11/1221)
Supplement: s1 [file s1]

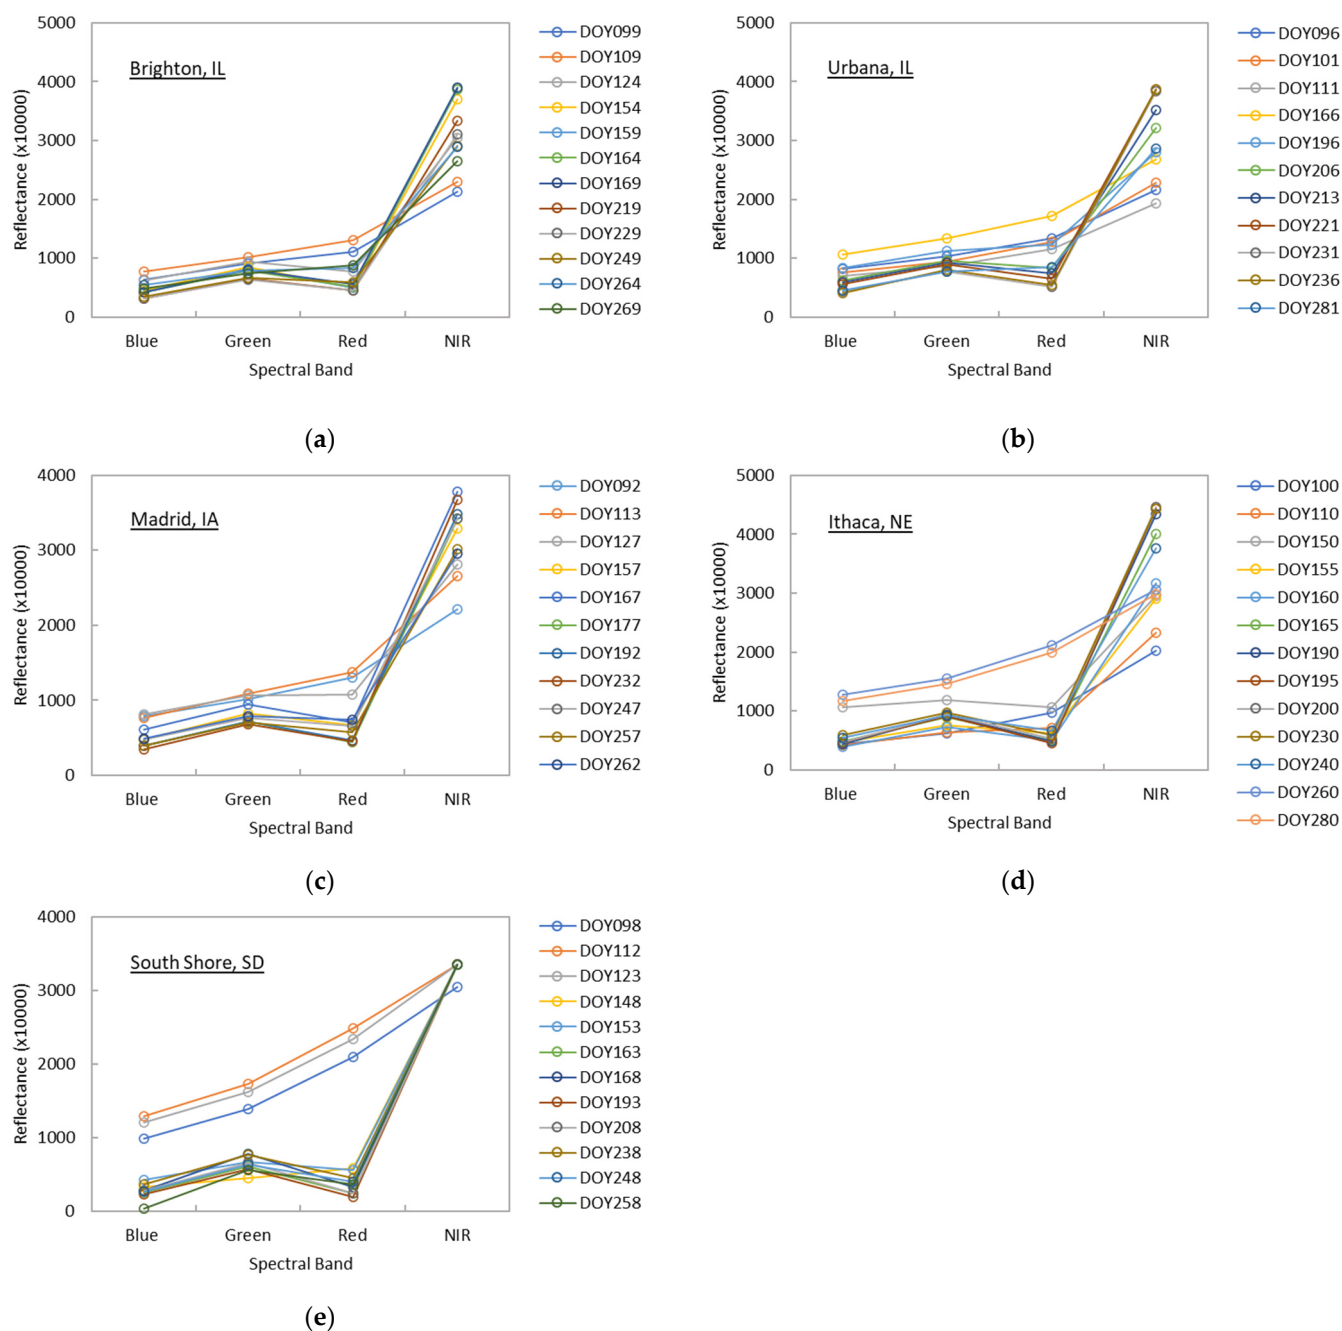

**Figure S1.** The spectral reflectance profile of the five study sites. (a) Brighton, Illinois (IL); (b) Urbana, IL; (c) Madrid, Iowa (IA); (d) Ithaca, Nebraska (NE); and (e) South Shore, South Dakota (SD), sites. The spectral reflectance value of each band was averaged over all switchgrass cultivars and perennial grass types at each study site. NIR = near-infrared; DOY = day-of-year.

**Table S1.** Additional field characteristics and management data.

| Site                                          | Soil Type                                                                                                                                                          | Herbicide                           |                                                                                                                                     | Fertilizer              |                                           |
|-----------------------------------------------|--------------------------------------------------------------------------------------------------------------------------------------------------------------------|-------------------------------------|-------------------------------------------------------------------------------------------------------------------------------------|-------------------------|-------------------------------------------|
|                                               |                                                                                                                                                                    | Date                                | Description                                                                                                                         | Date                    | Description                               |
| Brighton, IL<br>39°3'23.23"N,<br>90°11'7.62"W | <u>Elco silt loam</u> 5-18% slope (fine-silty, mixed, superactive, mesic Oxyaquic Hapludalfs)                                                                      |                                     | Atrazine (2-chloro-4-ethylamino-6-isopropylamino-1,3,5-triazine 2.3 L/ha; Round-up (Glyphosate 0.58 L/ha)                           | 4/15/2020               | UAN 32% N                                 |
|                                               | <u>Homen silt loam</u> 2-5% (fine-silty, mixed, superactive, mesic Fragic Oxyaquic Hapludalfs)                                                                     | 4/6/2020                            |                                                                                                                                     |                         |                                           |
|                                               | <u>Bunkum silt loam</u> 5-10% (fine-silty, mixed, superactive, mesic Aquic Hapludalfs)                                                                             |                                     |                                                                                                                                     |                         |                                           |
|                                               | <u>Keomah silt loam</u> 0-2% (Fine, smectitic, mesic Aeric Endoaqualfs)                                                                                            |                                     |                                                                                                                                     |                         |                                           |
| Urbana, IL<br>40°4'7.68"N,<br>88°11'26.78"W   | <u>Drummer silt clay loam</u> 0-2% slope (fine-silty, mixed superactive, mesic Typic Endoaquolis)                                                                  | 5/30/2020                           | Atrazine (2-chloro-4ethylamino-6-isopropylamino-1,3,5-triazine 2.3 L/ha)                                                            | Not applicable          | Establishment year- no fertilizer applied |
|                                               | <u>Flanagan silt loam</u> 0-2% slope (Fine, smectitic, mesic Aquic Argiudolis)                                                                                     |                                     |                                                                                                                                     |                         |                                           |
|                                               | <u>Clarion loam</u> 2-10% slope (Fine-loamy, mixed superactive, mesic Typic Hapludolls)                                                                            |                                     |                                                                                                                                     |                         |                                           |
| Iowa<br>41°55'52.17,<br>93°45'49.28"W         | <u>Coland clay loam</u> 0-2% (Fine-loamy, mixed, superactive, mesic Cumulic Endoaquolis)                                                                           |                                     |                                                                                                                                     |                         |                                           |
|                                               | <u>Spillville loam</u> 2-5% (Fine-loamy, mixed, superactive, mesic Cumulic Hapludolls)                                                                             | 6/4/2020;<br>7/1/2020;<br>7/17/2020 | 2,4-D (1.9 L/ha)<br>Stinger (clopyralid 0.4 L/ha)<br>Quinclorac (1.2 L/ha)                                                          | 6/4/2020                | UAN 32% N                                 |
|                                               | <u>Zenor sandy loam</u> 5-9% (Coarse-loamy, mixed, superactive, mesic Typic Hapludolls)                                                                            |                                     |                                                                                                                                     |                         |                                           |
|                                               | <u>Nicollet loam</u> 1-3% (Fine-loamy, mixed, superactive, mesic Aquic Hapludolls)                                                                                 |                                     |                                                                                                                                     |                         |                                           |
| Nebraska<br>41°8'57.54"N,<br>96°27'14.07"W    | <u>Yutan silty clay loam</u> 2-6% slope (Fine-loamy, mixed, superactive, mesic Mollic Hapludalfs)                                                                  |                                     | Atrazine (2-chloro-4ethylamino-6-isopropylamino-1,3,5-triazine 2.4 L/ha); 2,4-D (2.4 L/ha); Dual II Magnum (S-metolachlor 1.2 L/ha) | 5/1/2020 –<br>5/11/2020 | Urea 46% N;<br>Independence               |
|                                               | <u>Tomek silt loam</u> 0-2% (Fine, smectitic, mesic Pachic Argiudolls)                                                                                             | 5/12/2020                           |                                                                                                                                     |                         |                                           |
|                                               | <u>Filbert silt loam</u> 0-1% (Fine, smectitic, mesic Vertic Argialbolls)                                                                                          |                                     |                                                                                                                                     |                         |                                           |
| South Dakota                                  | <u>Vienna-Brookings Complex</u> 0-2% slope (Fine-loamy, mixed, superactive, frigid Calcic Hapludolls and fine-silty, mixed, superactive, frigid Pachic Hapludolls) | Not applicable                      | Not needed                                                                                                                          | 6/22/2020               | UAN 28% N                                 |

---

45°6'20.30"N, Renshaw-Fordville loam 0-6% (Fine-loamy over sandy or sandy skeletal,  
97°3'42.41"W mixed, superactive, frigid Calcic and Pachic Hapludolls)

---

**Table S2.** Plant frequency across perennial grass crops/cultivars in the spring-summer of 2020.

| Site         | All crops/cultivars<br>Average cover<br>[min.–max.]<br>(%) | By crop/cultivar<br>density [min.–max.]<br>(%)                                                  |
|--------------|------------------------------------------------------------|-------------------------------------------------------------------------------------------------|
| Brighton, IL | 30% [10–60%]                                               | Liberty SW [11–26%]<br>Independence SW [9–29%]<br>Shawnee SW [41–62%]                           |
| Urbana, IL   | 50% [32–67%]                                               | Liberty SW [32–67%]<br>Independence SW [35–55%]                                                 |
| Iowa         | 46% [2–93%]                                                | Liberty SW [34–71%]<br>Independence SW [2–18%]<br>Shawnee SW [51–93%]                           |
| Nebraska     | 85% [75–98%]                                               | Liberty SW [57–83%]<br>Big bluestem [82–93%]<br>Low diversity [83–98%]<br>Independence SW [76%] |
| South Dakota | 100% [100–100%]                                            | Carthage SW [100–100%]<br>Sunburst SW [100–100%]                                                |

min. = minimum; max. = maximum; SW = switchgrass.
